# Supplementary material
Source: PubMed Central journal article supplement (PMC3159832)
Supplement: NIHMS307736-supplement-1.pdf [file NIHMS307736-supplement-1.pdf]

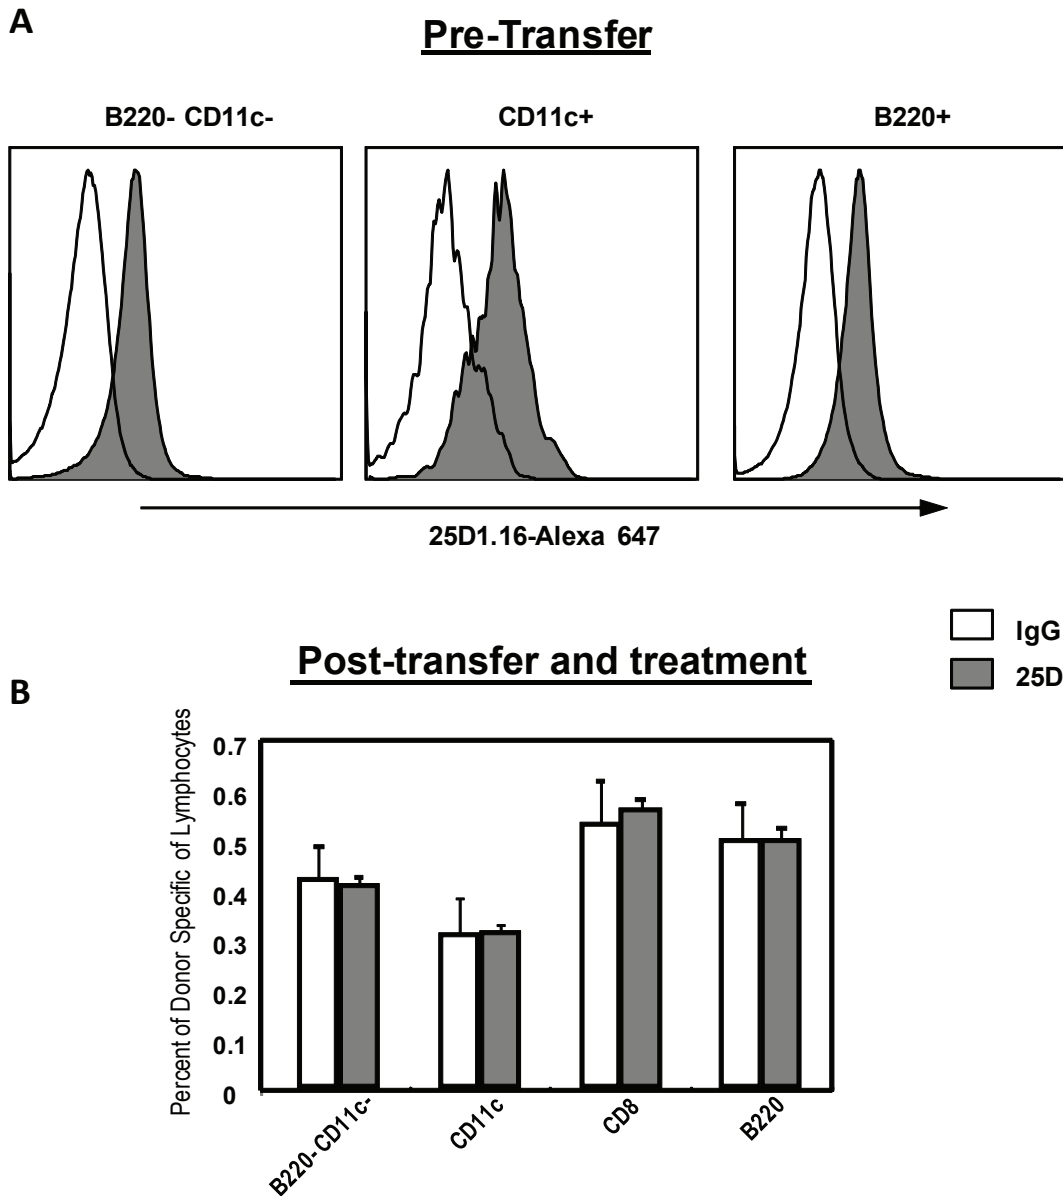

**Supplemental figure 1. Treatment with 25D1.16 mAb does not cause the depletion of SIINFEKL presenting cells.** CD45.1+ splenocytes were coated with SIINFEKL peptide then adoptively transferred into CD45.2 hosts which were treated with 500  $\mu$ g of either rat IgG or 25D1.16 mAb. Three days after transfer the spleens were harvested and transferred cells detected by flow cytometry. **(A)** B220- CD11c-, CD11c+ and B220+ splenocytes all expressed surface MHC:SIINFEKL complexes as detected by Alexa 647 conjugated 25D1.16 mAb. **(B)** The percentage of transferred cells recovered from either IgG or 25D1.16 mAb treated mice is represented graphically.

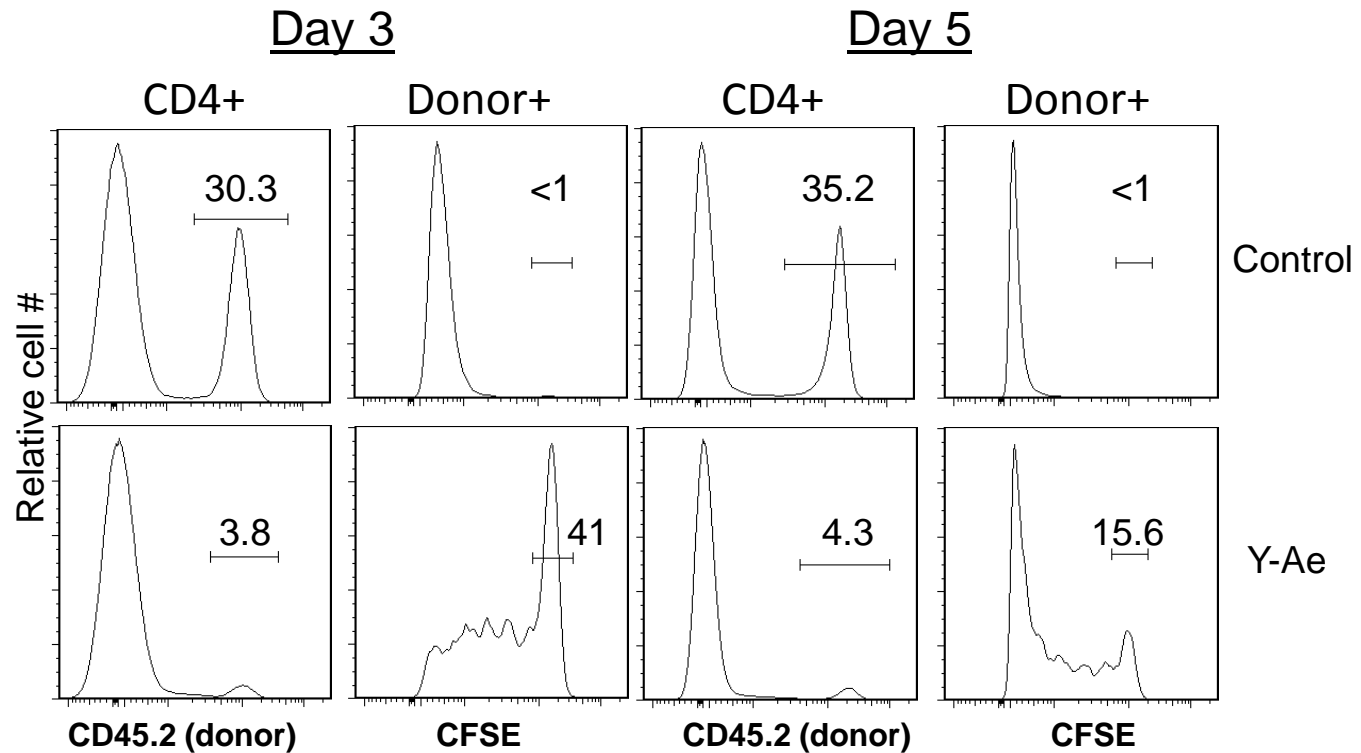

**Supplemental Figure 2. Y-Ae affects the response through inhibition of proliferation.  $1 \times 10^5$  CFSE-labeled CD45.2 TEa cells were transferred and 24 hrs later the mice were injected with 100ug Y-Ae and infected with VSV-GSE. At 3 and 5 days after infection the expansion and CFSE dilution of the Tea cells was measured by flow cytometry.**

| Day after infection | Control IgG               | 25D.1.16                  |
|---------------------|---------------------------|---------------------------|
| 4                   | $2.7 \pm 0.3 \times 10^4$ | $3.0 \pm 0.8 \times 10^4$ |
| 8                   | Not detected              | Not detected              |

**Supplemental Table 1.** Virus titers in the lung are not affected by 25D.1.16 treatment. Mice were infected with influenza virus (WSN-ova) and the next day were treated with 250ug of control IgG or 25D.1.16. Lungs were harvested 4 and 8 days after infection and virus titers were determined by plaque assay using MDCK cells. Values represent the average titers per whole lung +/- the SD of 3 mice per group. No statistically significant difference was detected between the groups.
